# Supplementary figures and images for: Cuticular proteins (crusticuls) affect 3D chitin bundle nanostructure
Source: Royal Society of Chemistry journal article supplement (doi:10.1039/d5nr01455g), 2025-01-01

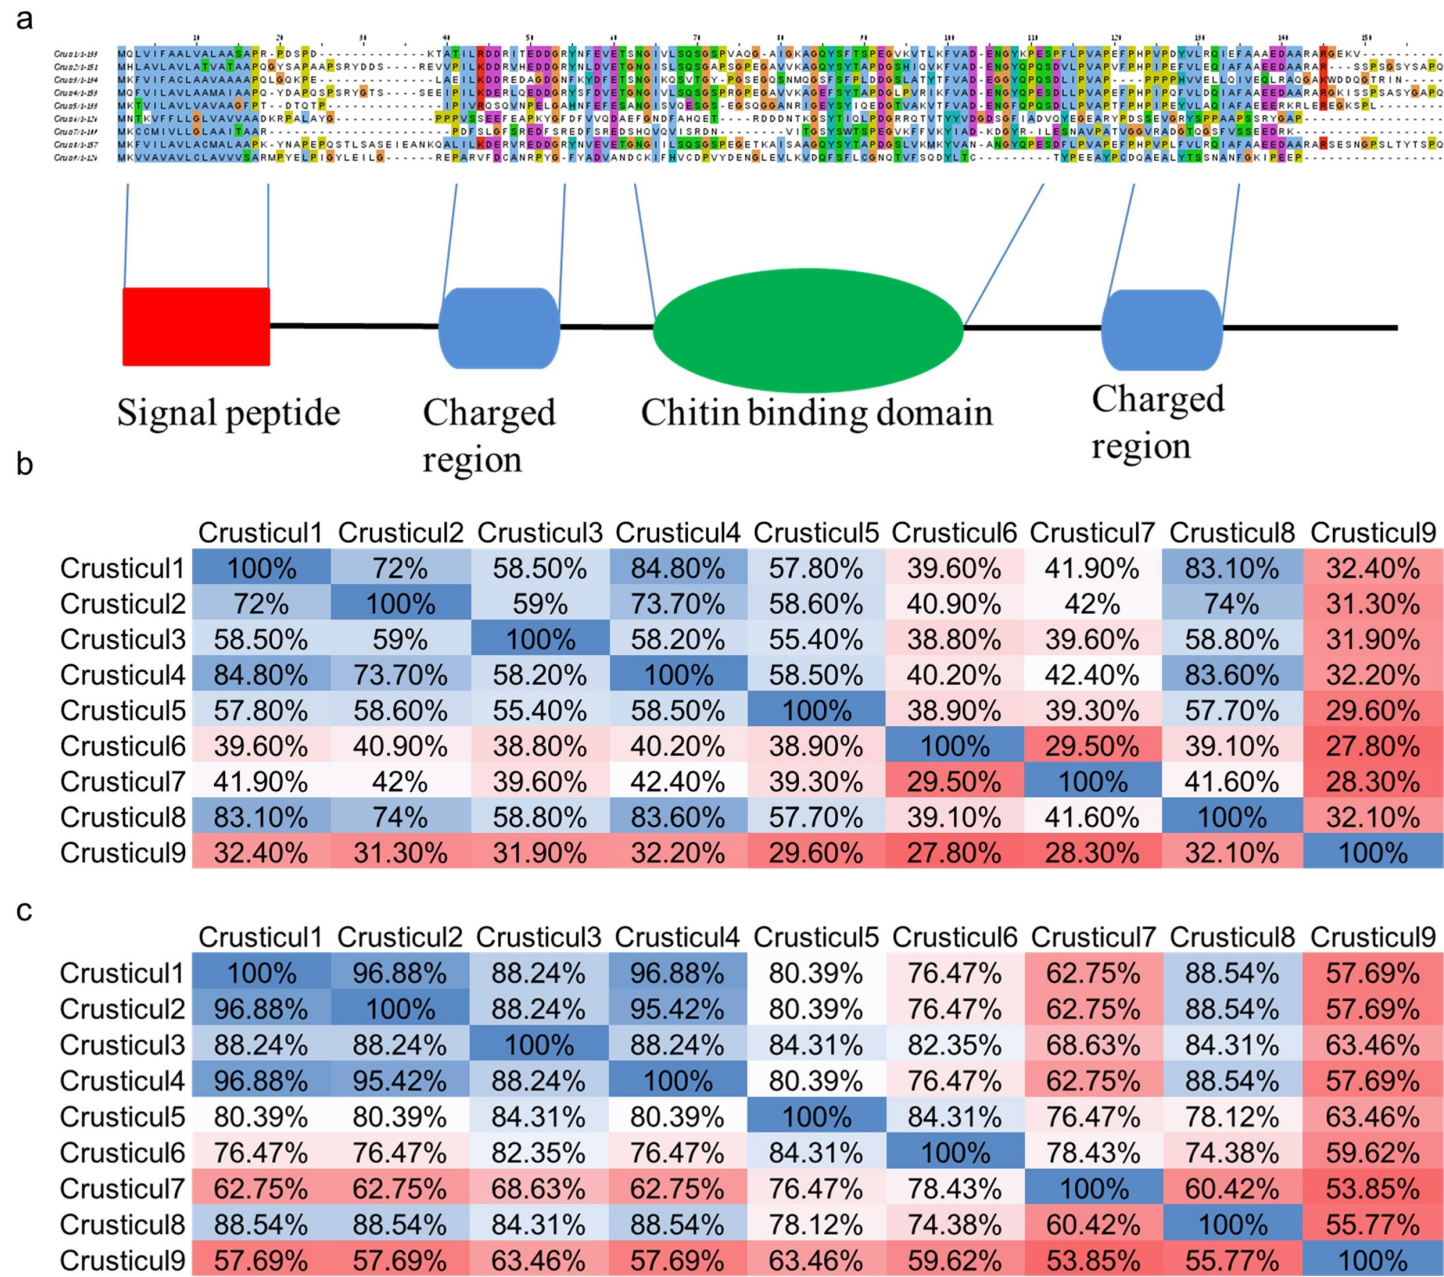

Supplement: d5nr01455g3.pdf [file d5nr01455g3.pdf]

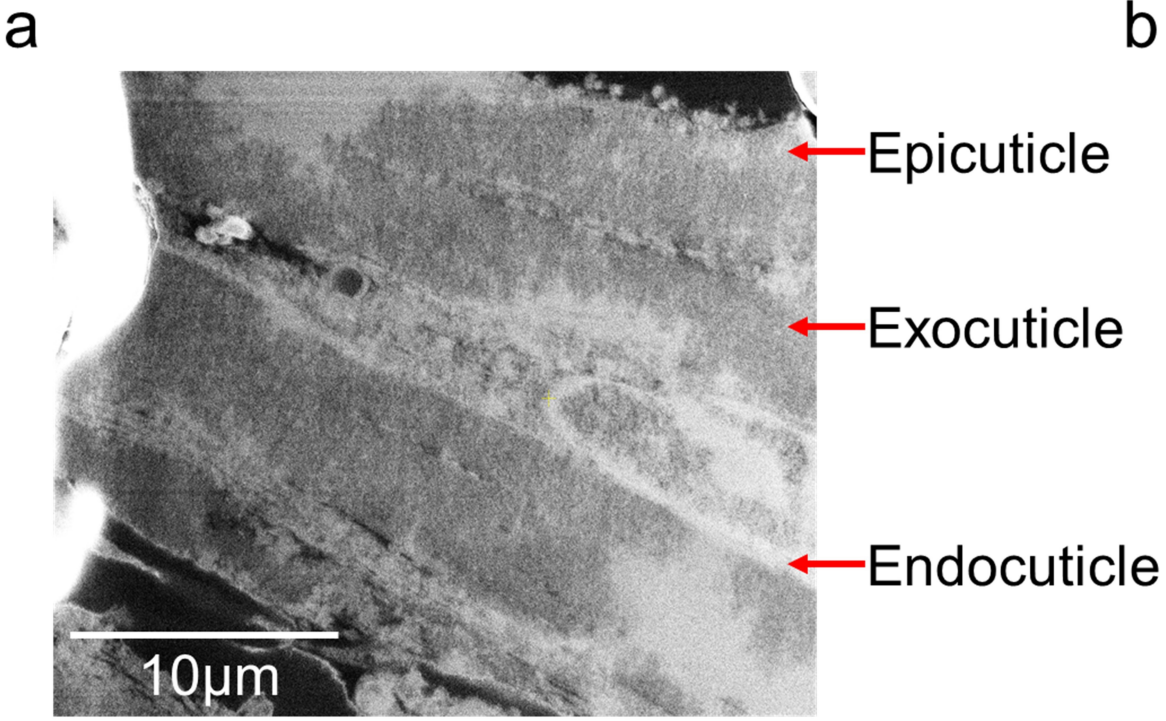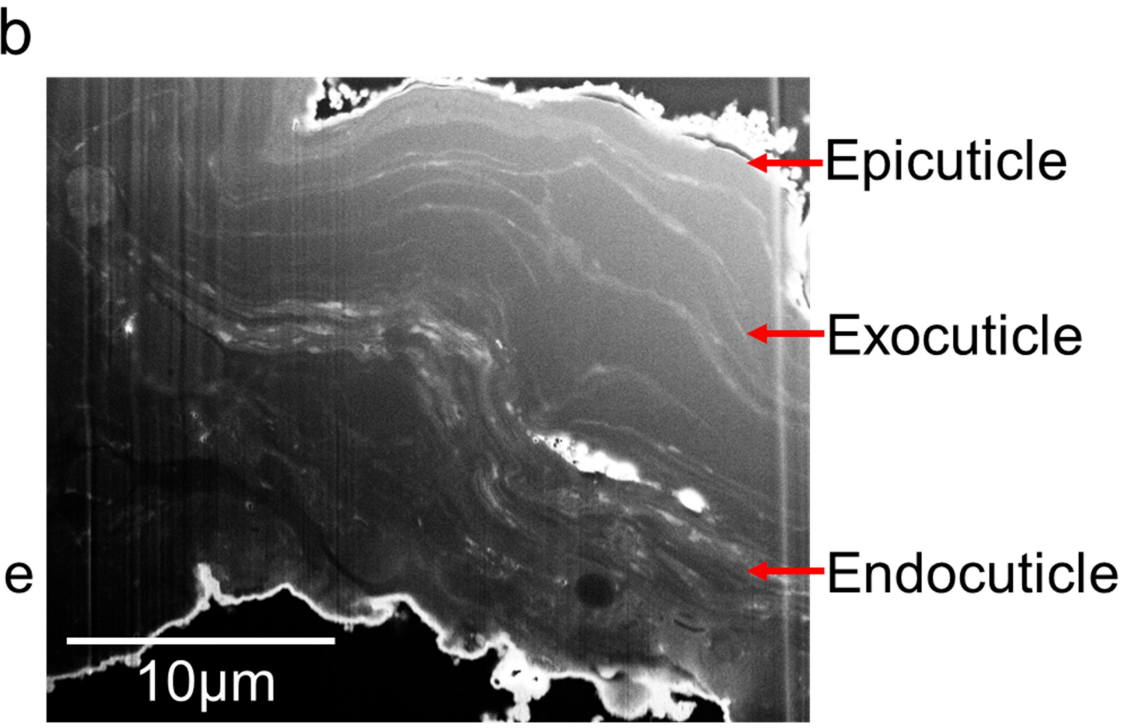

Supplement: d5nr01455g6.pdf [file d5nr01455g6.pdf]

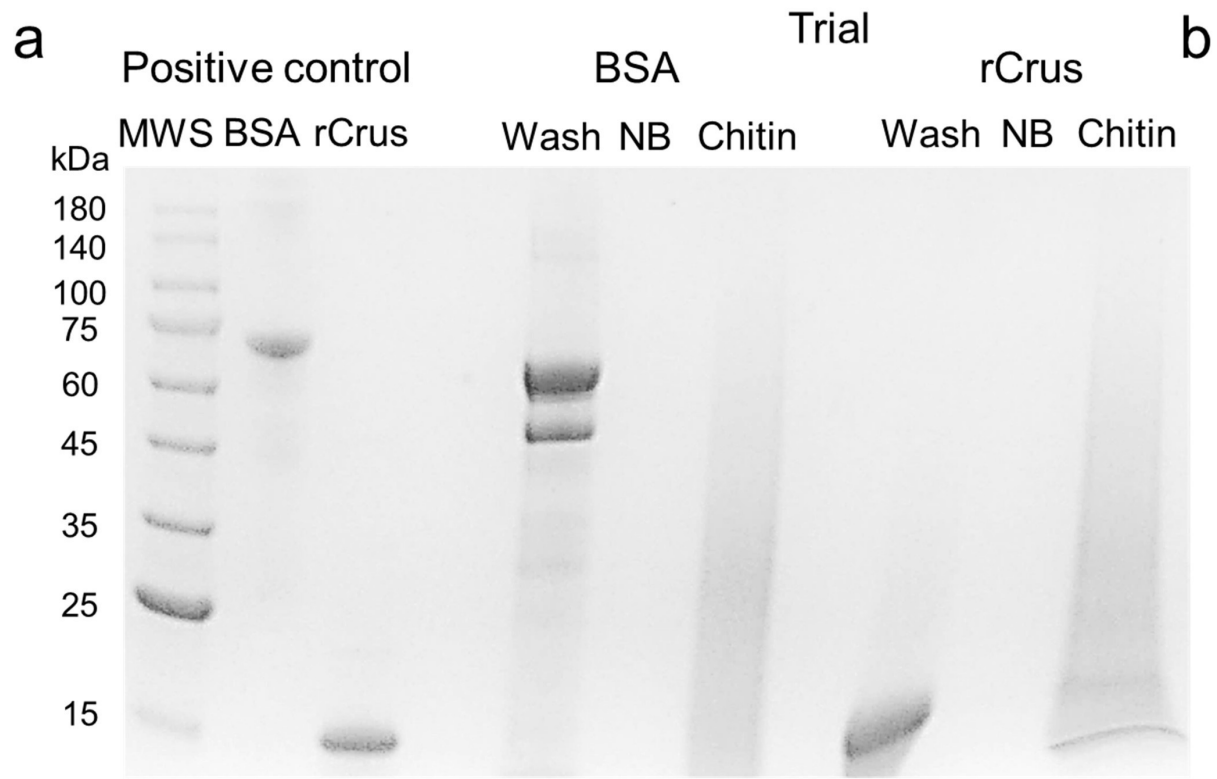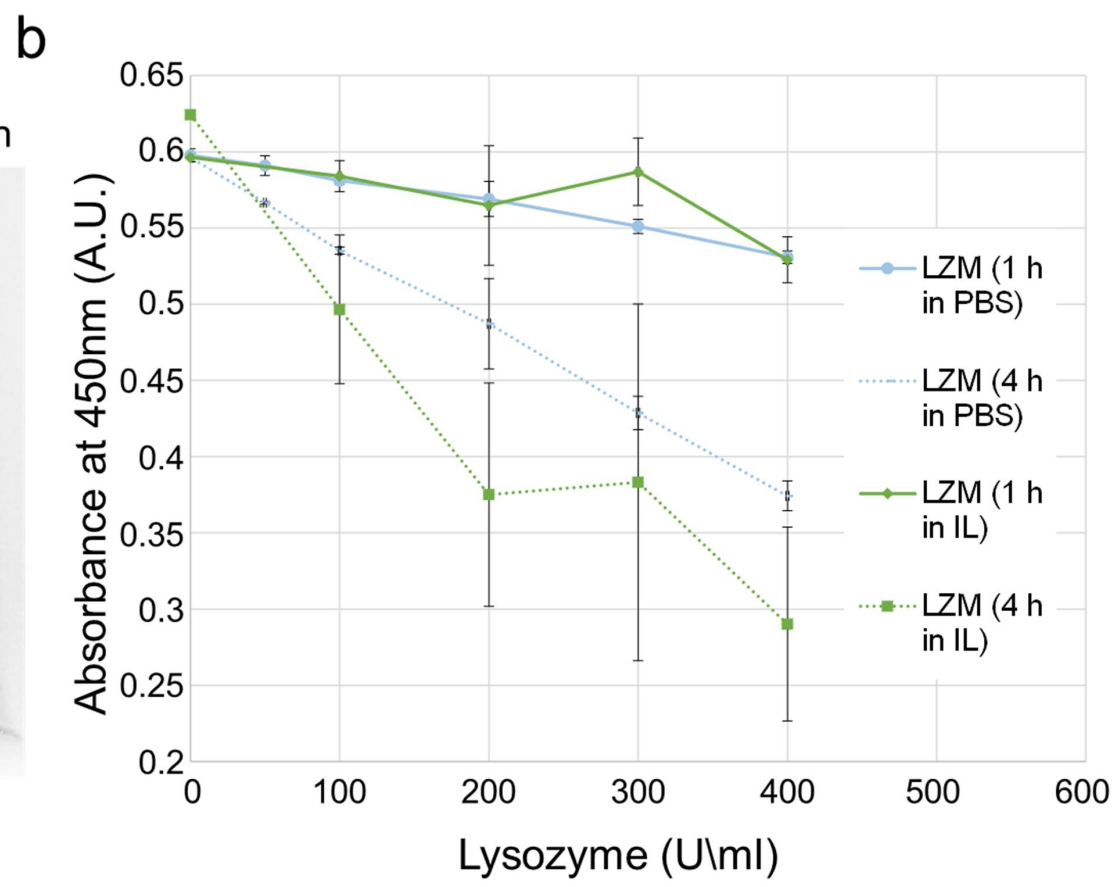

Supplement: d5nr01455g7.pdf [file d5nr01455g7.pdf]
